# Supplementary material for: Specific mutations in H5N1 mainly impact the magnitude and velocity of the host response in mice
Source: PubMed Central journal article supplement (PMC3750405; doi:10.1186/1752-0509-7-69), 2013-07-29

# SUPPLEMENTARY FIGURE 5

A.

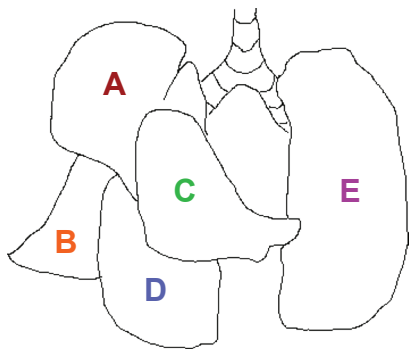

## Sample Collection Experiments:

A/C - RNA (microarray)

B - Proteins (global proteomics)

D - Virus titer

E - Histology

B.

20-Week-Old C57BL/6 Mice  
(Dosage: 10,000 PFU)

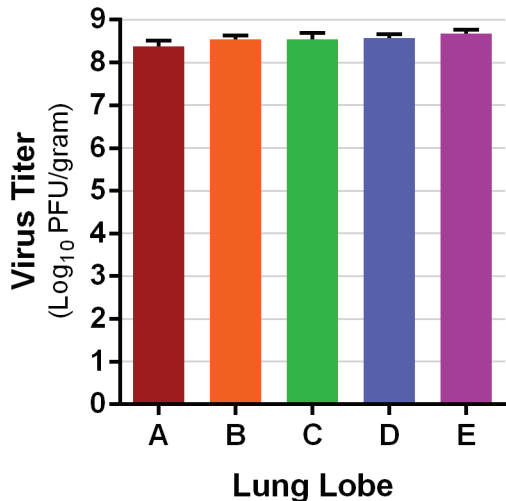

Supplement: 1752-0509-7-69-S8.pdf [file 1752-0509-7-69-S8.pdf]
