# Supplementary material for: Specific mutations in H5N1 mainly impact the magnitude and velocity of the host response in mice
Source: BMC Syst Biol. 2013 Jul 29;7:69. doi: 10.1186/1752-0509-7-69 (PMC3750405; doi:10.1186/1752-0509-7-69)
Supplement: Additional file 2: Figure S2 — Statistical comparison of titer, mRNA and genomic RNA. Graphical table showing the statistical comparisons of viral titer, viral mRNA and viral genomic RNA measurements between all the infection conditions and at all the time points post-infection. The Student's t-test has been used to asset the statistical differences between the groups for all the different kind of measurements. Comparisons having a p-value less than 0.05 have been colored in red. [file 1752-0509-7-69-S2.pdf]

## SUPPLEMENTARY FIGURE 2

[illegible]
